# Supplementary material for: Integrative structural annotation of de novo RNA-Seq provides an accurate reference gene set of the enormous genome of the onion (Allium cepa L.)
Source: PubMed Central journal article supplement (PMC4379974; doi:10.1093/dnares/dsu035), 2014-10-31
Supplement: supp_dsu035_dsu035supp_figure1.pdf [file supp_dsu035_dsu035supp_figure1.pdf]

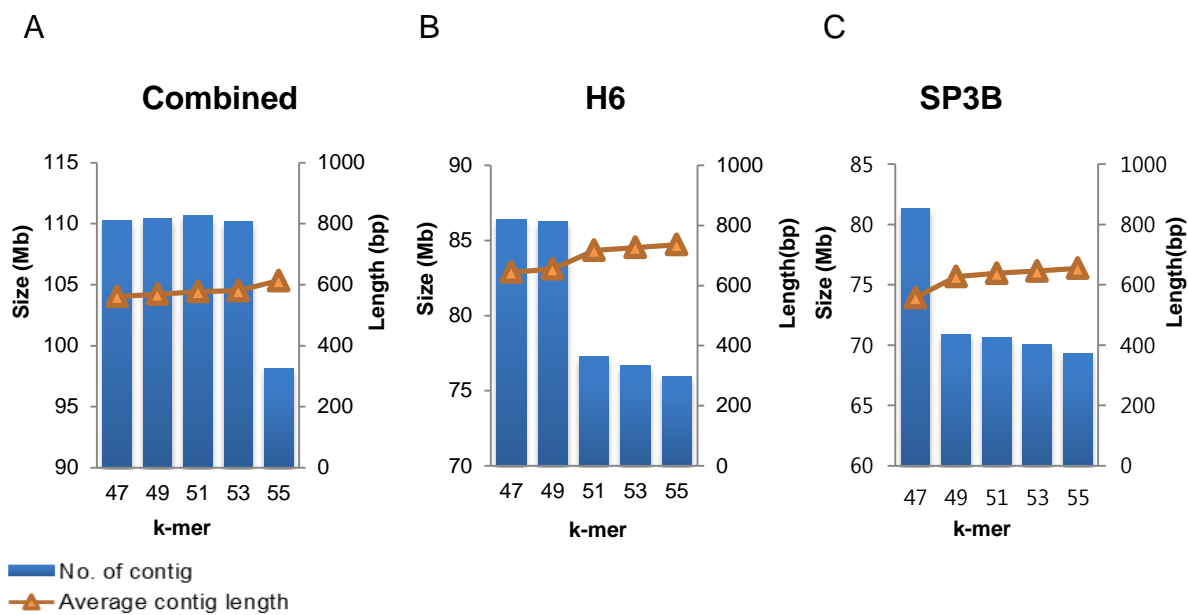

**Figure S1. Comparison of *de novo* assembly using various k-mer values.** Left and right of y-axis indicates total and average length of assembly respectively. The x-axis represents used k-mer values for assembly.
