# Supplementary material for: Integrative structural annotation of de novo RNA-Seq provides an accurate reference gene set of the enormous genome of the onion (Allium cepa L.)
Source: PubMed Central journal article supplement (PMC4379974; doi:10.1093/dnares/dsu035), 2014-10-31
Supplement: supp_dsu035_dsu035supp_figure2.pdf [file supp_dsu035_dsu035supp_figure2.pdf]

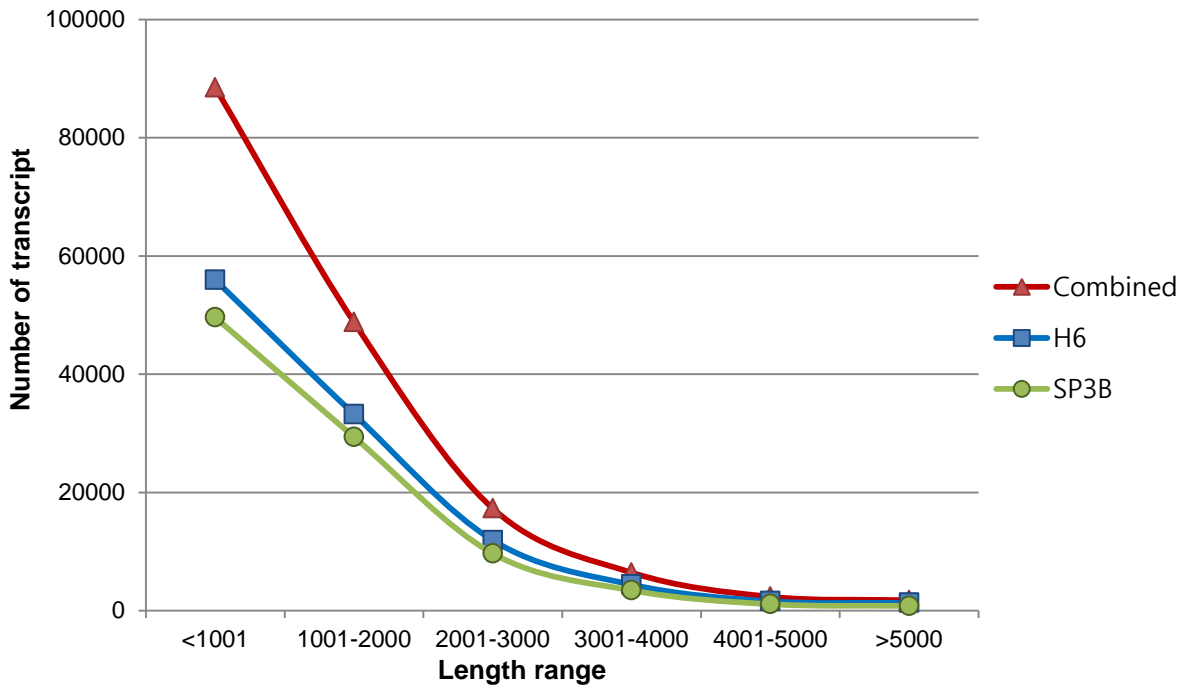

**Figure S2. Length distribution of assembled transcripts of combined, H6 and SP3B.** The x-axis indicates length of assembly and the y-axis represents of number of assembled transcript.
