# Supplementary material for: Integrative structural annotation of de novo RNA-Seq provides an accurate reference gene set of the enormous genome of the onion (Allium cepa L.)
Source: PubMed Central journal article supplement (PMC4379974; doi:10.1093/dnares/dsu035), 2014-10-31
Supplement: supp_dsu035_dsu035supp_figure3.pdf [file supp_dsu035_dsu035supp_figure3.pdf]

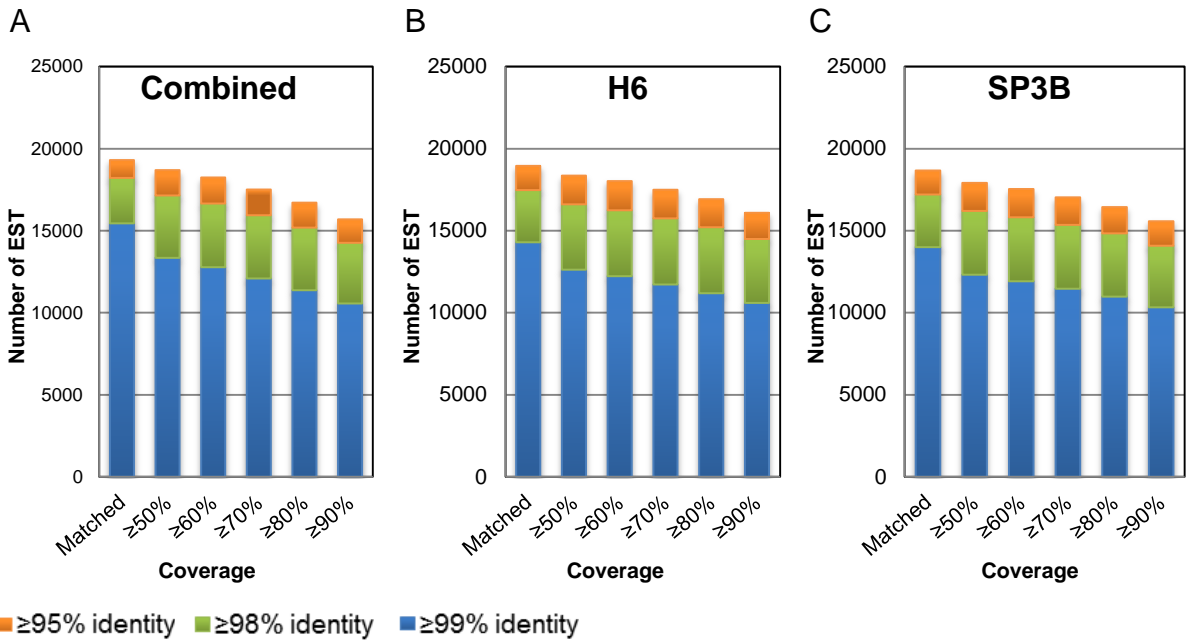

**Figure S3. Validation of *de novo* assembly using 20,159 of onion ESTs.** The x-axis indicates coverage of assembly for ESTs. The y-axis represents number of ESTs.
