# Supplementary material for: Integrative structural annotation of de novo RNA-Seq provides an accurate reference gene set of the enormous genome of the onion (Allium cepa L.)
Source: PubMed Central journal article supplement (PMC4379974; doi:10.1093/dnares/dsu035), 2014-10-31
Supplement: supp_dsu035_dsu035supp_table1.pdf [file supp_dsu035_dsu035supp_table1.pdf]

**Table S1. Statistics of preprocessed raw reads.**

| <b>Cultivar</b> | <b>Raw data(Gb)</b> | <b>Step1<sup>a</sup>(Gb)</b> | <b>Step2<sup>b</sup>(Gb)</b> | <b>Step3<sup>c</sup>(Gb)</b> | <b>Step<sup>d</sup>(Gb)</b> |
|-----------------|---------------------|------------------------------|------------------------------|------------------------------|-----------------------------|
| <b>H6</b>       | 14.98               | 14.96                        | 12.02                        | 10.12                        | 10.08                       |
| <b>SP3B</b>     | 11.57               | 11.57                        | 9.55                         | 7.94                         | 7.91                        |
| <b>Total</b>    | 26.55               | 26.53                        | 21.57                        | 18.06                        | 17.99                       |

<sup>a</sup>Removal of bacterial genome using reference mapping

<sup>b</sup>Removal of duplicated reads

<sup>c</sup>Quality trimming (cut off = Q20)

<sup>d</sup>Removal of rRNA
