# Supplementary material for: Integrative structural annotation of de novo RNA-Seq provides an accurate reference gene set of the enormous genome of the onion (Allium cepa L.)
Source: PubMed Central journal article supplement (PMC4379974; doi:10.1093/dnares/dsu035), 2014-10-31
Supplement: supp_dsu035_dsu035supp_table2.pdf [file supp_dsu035_dsu035supp_table2.pdf]

**Table S2. Statistics of *de novo* transcriptome assembly.**

| <b>Assembly</b> | <b>Total number</b> | <b>Base-pairs(Mbp)</b> | <b>N50(bp)</b> | <b>Mean(bp)</b> | <b>Max(bp)</b> | <b>Min(bp)</b> |
|-----------------|---------------------|------------------------|----------------|-----------------|----------------|----------------|
| <b>H6</b>       | 108,450             | 137.9                  | 1,790          | 1,271.2         | 16,429         | 200            |
| <b>SP3B</b>     | 94,051              | 114.0                  | 1,695          | 1,211.8         | 16,482         | 200            |
| <b>Combined</b> | 165,179             | 203.0                  | 1,756          | 1,228.9         | 16,504         | 200            |
