# Supplementary material for: Integrative structural annotation of de novo RNA-Seq provides an accurate reference gene set of the enormous genome of the onion (Allium cepa L.)
Source: PubMed Central journal article supplement (PMC4379974; doi:10.1093/dnares/dsu035), 2014-10-31
Supplement: supp_dsu035_dsu035supp_table3.pdf [file supp_dsu035_dsu035supp_table3.pdf]

**Table S3. The amount of transposable elements (TEs) in onion transcriptome assembly.**

| Type of TEs           | Combined    |               | H6          |               | SP3B        |               |
|-----------------------|-------------|---------------|-------------|---------------|-------------|---------------|
|                       | Length (bp) | % in assembly | Length (bp) | % in Assembly | Length (bp) | % in assembly |
| <b>SINEs</b>          | 181,919     | 0.09          | 128,334     | 0.09          | 90,903      | 0.08          |
| <b>LINEs</b>          | 5,245,049   | 2.58          | 3,443,494   | 2.50          | 2,471,579   | 2.17          |
| <b>LTR elements</b>   | 6,124,193   | 3.02          | 4,212,620   | 3.06          | 2,625,618   | 2.30          |
| <b>DNA elements</b>   | 4,120,452   | 2.03          | 2,636,857   | 1.91          | 1,769,302   | 1.55          |
| <b>Simple repeats</b> | 1,708,443   | 0.84          | 1,142,352   | 0.83          | 918,098     | 0.81          |
| <b>Low complexity</b> | 412,511     | 0.20          | 268,572     | 0.19          | 232,315     | 0.20          |
| <b>Unclassified</b>   | 21,090,264  | 10.39         | 14,403,114  | 10.45         | 11,097,869  | 9.74          |
| <b>Total</b>          | 38,882,831  | 19.15         | 26,235,343  | 19.03         | 19,205,684  | 16.85         |
