# Supplementary material for: Integrative structural annotation of de novo RNA-Seq provides an accurate reference gene set of the enormous genome of the onion (Allium cepa L.)
Source: PubMed Central journal article supplement (PMC4379974; doi:10.1093/dnares/dsu035), 2014-10-31
Supplement: supp_dsu035_dsu035supp_table4.pdf [file supp_dsu035_dsu035supp_table4.pdf]

**Table S4. Summary of all annotated gene sets of combined library from each step of in-house pipeline.**

|                                 | Independent process <sup>a</sup> | Step 1 <sup>b</sup> | Step 2 <sup>c</sup> | Step 3 <sup>d</sup> | Step2+3 <sup>e</sup> | Final <sup>f</sup> |
|---------------------------------|----------------------------------|---------------------|---------------------|---------------------|----------------------|--------------------|
| <b>Number of genes</b>          | 65,645                           | 42,435              | 42,435              | 51,092              | 61,852               | 54,165             |
| <b>Number of complete genes</b> | 53,071                           | 3,704               | 26,598              | 33,154              | 35,995               | 32,791             |
| <b>Number of partial genes</b>  | 12,574                           | 38,731              | 15,837              | 17,938              | 25,857               | 21,374             |
| <b>Total gene length (Mbp)</b>  | 62.03                            | 40.26               | 45.96               | 56.28               | 63.83                | 59.60              |
| <b>Avg length of gene (bp)</b>  | 945.00                           | 948.43              | 1,082.98            | 1,101.83            | 1,031.96             | 1,100.40           |

<sup>a</sup>Gene model extracted by six-frame translation

<sup>b</sup>Gene model derived from evidence proteins

<sup>c</sup>Extended gene model through translation for partial genes in step 2

<sup>d</sup>*Ab initio* predicted gene model

<sup>e</sup>Integrated gene model of step 2 and 3

<sup>f</sup>Final gene set
