# Supplementary material for: Integrative structural annotation of de novo RNA-Seq provides an accurate reference gene set of the enormous genome of the onion (Allium cepa L.)
Source: PubMed Central journal article supplement (PMC4379974; doi:10.1093/dnares/dsu035), 2014-10-31
Supplement: supp_dsu035_dsu035supp_table5.pdf [file supp_dsu035_dsu035supp_table5.pdf]

**Table S5. Number of validated proteins and their corresponding genes from ISGAP and six-frame translation.**

| Data   | Type                       | Mapped in Assembly |                | ISGAP           |                |                 | Six-frame translation |                |                 |
|--------|----------------------------|--------------------|----------------|-----------------|----------------|-----------------|-----------------------|----------------|-----------------|
|        |                            | #Mapped Protein    | #Mapped Region | #Mapped Protein | #Mapped Region | #Annotated Gene | #Mapped Protein       | #Mapped Region | #Annotated Gene |
| Onion  | Whole <sup>a</sup>         | 398                | 1,008          | 351             | 866            | 348             | 344                   | 746            | 281             |
|        | Both <sup>b</sup>          | 322                | 693            | 322             | 693            | 255             | 322                   | 693            | 255             |
|        | Specific <sup>c</sup>      | 188                | 315            | 120             | 173            | 94              | 35                    | 53             | 27              |
|        | Single Exon <sup>d</sup>   | 396                | 884            | 351             | 767            | 326             | 344                   | 746            | 281             |
|        | Multiple Exon <sup>e</sup> | 92                 | 124            | 78              | 99             | 23              | 0                     | 0              | 0               |
| RefSeq | Whole <sup>a</sup>         | 49,257             | 126,607        | 45,724          | 114,593        | 8,324           | 44,448                | 93,256         | 6,526           |
|        | Both <sup>b</sup>          | 42,126             | 87,168         | 42,126          | 87,168         | 5,984           | 42,126                | 87,168         | 5,984           |
|        | Specific <sup>c</sup>      | 21,056             | 39,439         | 16,373          | 27,425         | 2,341           | 3,393                 | 6,088          | 543             |
|        | Single Exon <sup>d</sup>   | 47,047             | 101,888        | 43,970          | 93,595         | 6,752           | 44,443                | 93,251         | 6,524           |
|        | Multiple Exon <sup>e</sup> | 14,450             | 24,719         | 12,904          | 20,998         | 1,573           | 6                     | 5              | 3               |

<sup>a</sup>Whole cases in the validation

<sup>b</sup>Cases which both gene sets covered

<sup>c</sup>Cases that genes of ISGAP or six-frame translation specifically covered

<sup>d</sup>Cases that public proteins were mapped as single exon gene

<sup>e</sup>Cases for multiple exon containing genes
